# Supplementary material for: The Antibacterial Activity of Honey Derived from Australian Flora
Source: PLoS One. 2011 Mar 28;6(3):e18229. doi: 10.1371/journal.pone.0018229 (PMC3065476; doi:10.1371/journal.pone.0018229)
Supplement: Supporting Table S1 — Complete list of honey samples included in survey including floral source, geographic region and antibacterial activity (total and non-peroxide) for each sample. (XLS) [file pone.0018229.s001.xls]

## Sheet: Sheet1
Supplementary Table S1: Antibacterial activity of Australian Apis mellifera honey samples
Batch designation	Floral source	Scientific name	State	Region	Level of Activity (% phenol equivalent)1
					Total 1	Total 2	Average total	SD	Non-peroxide 1	Non-peroxide 2	Average non-peroxide	SD
A1	Avocado	Persea americana	QLD	Southeast Coast	22.3	21.3	21.8	0.7	0	0	0	0
A2	Avocado	Persea americana	QLD	Southeast Coast	23.4	22.3	22.9	0.8	0	0	0	0
AB1	Apple box/red stringybark	Eucalyptus bridgesiana, Eucalyptus macrorhynca	NSW	Southern Tablelands	34	34.5	34.3	0.4	0	0	0	0
AB2	Apple box	Eucalyptus bridgesiana	VIC	East Gippsland	23.3	20.4	21.9	2.1	0	0	0	0
AB3	Apple box	Eucalyptus bridgesiana	NSW	Central Tablelands	0	0	0	0	0	0	0	0
B1	Billy Buttons	Craspedia glauca	NSW	Central West Slopes and Plains	0	0	0	0	0	0	0	0
B2	Saw banksia	Banksia serrata	VIC	East Gippsland	0	0	0	0	0	0	0	0
B3	Saw banksia	Banksia serrata	VIC	West and South Gippsland	0	0	0	0	0	0	0	0
B4	Saw banksia	Banksia serrata	VIC	West and South Gippsland	0	0	0	0	0	0	0	0
B5	Red banksia	Banksia ericifolia or serrata	NSW	Northern Rivers	0	0	0	0	0	0	0	0
B6	Bush honey		QLD	North Tropical Coast and Tablelands	16.7	15.7	16.2	0.7	0	0	0	0
B7	Banksia	Banksia serrata	VIC	West and South Gippsland	0	0	0	0	0	0	0	0
B8	Banksia	Banksia sp.	TAS	Central North and Midlands	23.6	24.5	24.1	0.6	0	0	0	0
B9	Hairpin banksia	Banksia spinulosa	NSW	Illawarra	21.7	22	21.9	0.2	0	0	0	0
B10	Bundy	Eucalyptus goniocalyx	NSW	Central Tablelands	13.6	13.7	13.7	0.1	0	0	0	0
B11	Banksia	Banksia sp.	NSW	Illawarra	18	16.2	17.1	1.3	0	0	0	0
B12	Banksia	Banksia sp.	NSW	Illawarra	18.5	18.4	18.5	0.1	0	0	0	0
B13	Banksia	Banksia sp.	NSW	Illawarra	16.9	17.2	17.1	0.2	0	0	0	0
B14	Banksia	Banksia sp.	NSW	Illawarra	12.6	13.3	13	0.5	0	0	0	0
B15	Banksia	Banksia sp.	NSW	Illawarra	16.8	16.2	16.5	0.4	0	0	0	0
B16	Banksia	Banksia sp.	NSW	Illawarra	19.2	19.1	19.2	0.1	0	0	0	0
B17	Banksia	Banksia sp.	NSW	Illawarra	0	0	0	0	0	0	0	0
B18	Banksia	Banksia sp.	NSW	Illawarra	17.6	17.4	17.5	0.1	0	0	0	0
B19	Banksia	Banksia sp.	NSW	Illawarra	17.7	17.6	17.7	0.1	0	0	0	0
B20	Banksia	Banksia sp.	NSW	Illawarra	17.1	16.3	16.7	0.6	0	0	0	0
B21	Banksia	Banksia sp.	NSW	Illawarra	14.8	13.6	14.2	0.8	0	0	0	0
B22	Banksia	Banksia sp.	NSW	Illawarra	14.9	15.1	15	0.1	0	0	0	0
B23	Banksia	Banksia sp.	NSW	Illawarra	15.9	14.6	15.3	0.9	0	0	0	0
B24	Banksia	Banksia sp.	NSW	Illawarra	15.4	14.7	15.1	0.5	0	0	0	0
B25	Banksia	Banksia sp.	NSW	Illawarra	16.2	14.1	15.2	1.5	0	0	0	0
B26	Banksia	Banksia sp.	NSW	Illawarra	15.3	14.7	15	0.4	0	0	0	0
B27	Banksia	Banksia sp.	NSW	Illawarra	11.1	11.6	11.4	0.4	0	0	0	0
B28	Banksia	Banksia sp.	NSW	Illawarra	14.7	15.2	15	0.4	0	0	0	0
B29	Banksia	Banksia sp.	NSW	Illawarra	13.9	12	13	1.3	0	0	0	0
B30	Banksia	Banksia sp.	NSW	Illawarra	12.3	11.8	12.1	0.4	0	0	0	0
B31	Banksia	Banksia sp.	NSW	Illawarra	13.5	12.8	13.2	0.5	0	0	0	0
B32	Banksia	Banksia sp.	NSW	Illawarra	13.9	12.1	13	1.3	0	0	0	0
B33	Holly leaved banksia	Banksia ilicifolia	WA	Unknown	0	0	0	0	0	0	0	0
B34	Menzies banksia	Banksia menziesii	WA	Unknown	0	0	0	0	0	0	0	0
B35	Banksia	Banksia marginata	WA	Unknown	11.7	13.3	12.5	1.1	0	0	0	0
B36	Desert banksia	Banksia ornata	SA	Murraylands	0	0	0	0	0	0	0	0
B37	Banksia	Banksia menziesii	WA	Lower West	0	0	0	0	0	0	0	0
B38	Fox banksia	Banksia sp.	WA	Central West	0	0	0	0	0	0	0	0
BB2	Forest blackbutt	Eucalyptus patens	WA	Lower West	23.6	23.7	23.7	0.1	0	0	0	0
BB3	Coastal blackbutt	Eucalyptus todtiana	WA	Lower West	0	0	0	0	0	0	0	0
BB4	Brush box	Lophostemon confertus	QLD	Southeast Coast	15.9	15.8	15.9	0.1	0	0	0	0
BB5	Brush box	Lophostemon confertus	NSW	Metropolitan	14.7	16.2	15.5	1.1	0	0	0	0
BB6	Billy buttons	Craspedia glauca	NSW	North West Slopes and Plains	0	0	0	0	0	0	0	0
BB7	Brownbarrel	Eucalyptus fastigata	NSW	South Coast	0	0	0	0	0	0	0	0
BB8	Coastal blackbutt	Eucalyptus todtiana	WA	Unknown	0	0	0	0	0	0	0	0
BG1	Blue gum	Eucalyptus globulus	TAS	East Coast	0	0	0	0	0	0	0	0
BG2	Blue gum	Eucalyptus globulus	TAS	South East Huon, Channel, and Lower Derwent Valley	0	0	0	0	0	0	0	0
BG3	Blue gum	Eucalyptus globulus	TAS	South East Huon, Channel and Lower Derwent Valley	14.2	16.4	15.3	1.6	0	0	0	0
BG4	Blue gum	Eucalyptus tereticornis	QLD	Southeast Coast	18.1	18.4	18.3	0.2	0	0	0	0
BG5	Blue gum	Eucalyptus leucoxylon	SA	Greater Adelaide and Mount Lofty Ranges	0	0	0	0	0	0	0	0
BL1	Hairpin banksia / Lepto flavescens	Banksia spinulosa, Leptospermum flavescens	NSW	Illawarra	18	19	18.5	0.7	0	0	0	0
BL2	Blueweed/ Lucerne	Echium vulgare, Medicago sativa	NSW	Southern Tablelands	17.1	17.2	17.2	0.1	0	0	0	0
BL3	Blueweed/ Lucerne	Echium vulgare, Medicago sativa	NSW	Southern Tablelands	14.7	14.5	14.6	0.1	0	0	0	0
BM1	Brush box and melaleuca	Lophostemon confertus, Melaleuca decora	NSW	Metropolitan	0	0	0	0	0	0	0	0
BW1	Inland bloodwood	Eucalyptus terminalis	NSW	Central West Slopes and Plains	0	0	0	0	0	0	0	0
BW2	Inland/desert Bloodwood	Eucalyptus terminalis / Eucalyptus spp.	NSW	Central West Slopes and Plains	0	0	0	0	0	0	0	0
BW3	Bloodwood	Eucalyptus gummifera	NSW	Central Tablelands	23.3	23.2	23.3	0.1	0	0	0	0
BW4	Coastal bloodwood	Eucalyptus sp.	NSW	Mid North Coast	0	0	0	0	0	0	0	0
C4	Coriander	Coriandrum sativum	NSW	Central West Slopes and Plains	0	0	0	0	0	0	0	0
C5	Coriander	Coriandrum sativum	NSW	Central West Slopes and Plains	0	0	0	0	0	0	0	0
C7	Canola	Brassica rapa	TAS	Central North and Midlands	0	0	0	0	0	0	0	0
C8	Chicory	Cichorium intybus	TAS	Central North and Midlands	0	0	0	0	0	0	0	0
C9	Clover	Trifolium repens	NSW	Metropolitan	17.6	15	16.3	1.8	0	0	0	0
C10	Coriander	Coriandrum sativum or Eryngium foetidum	NSW	Central West Slopes and Plains	0	0	0	0	0	0	0	0
C11	Citrus	Citrus spp.	NSW	Central West Slopes and Plains	0	0	0	0	0	0	0	0
C12	Clover	Trifolium repens	NSW	South West Slopes	13.8	14.8	14.3	0.7	9.2	9.1	9.2	0.1
C13	Clover	Trifolium repens	WA	Unknown	0	0	0	0	0	0	0	0
CF1	Coastal flora		SA	Kangaroo Island	16.9	17.4	17.2	0.4	0	0	0	0
CG1	Cup gum	Eucalyptus cosmophylla	SA	Kangaroo Island	0	0	0	0	0	0	0	0
CG2	Curse/gum	Echium plantagineum, Eucalyptus sp.	NSW	Southern Tablelands	13.1	13.4	13.3	0.2	0	0	0	0
CL1	Crows ash/ Lepto	Leptospermum polygalifolium, Guioa semiglauca	NSW	Northern Rivers	19.1	19.6	19.4	0.4	12.9	13.6	13.3	0.5
CL2	Crows ash/ Lepto	Leptospermum polygalifolium, Guioa semiglauca	NSW	Northern Rivers	15.5	14.9	15.2	0.4	12.7	13.1	12.9	0.3
CL3	Crows ash, Lepto	Leptospermum polygalifolium, Guioa semiglauca	NSW	Northern Rivers	0	0	0	0	0	0	0	0
CM1	Christmas Mallee	Eucalyptus socialis	NSW	Central West Slopes and Plains	0	0	0	0	0	0	0	0
CR1	Clover/Red gum	Trifolium repens, Angophora costata	NSW	Metropolitan	20	19.5	19.8	0.4	0	0	0	0
CT1	Cut-tail	Eucalyptus fastigata	VIC	East Gippsland	0	0	0	0	0	0	0	0
DB1	Diamond bush	Bossiaea laidlawiana	WA	Southwest	12.1	12.9	12.5	0.6	0	0	0	0
E2	Eucalyptus resinifera (red mahogany)	Eucalyptus resinifera	WA	Lower West	23	19.2	21.1	2.7	0	0	0	0
E3	Eucalyptus obliqua	Eucalyptus obliqua	VIC	Central	0	0	0	0	0	0	0	0
E4	Eucalyptus wandoo	Eucalyptus wandoo	WA	Lower West	0	0	0	0	0	0	0	0
E5	Eucalyptus campaspe (silver gimlet)	Eucalyptus campaspe	WA	Goldfields	0	0	0	0	0	0	0	0
E6	Eucalyptus gomphocephala (tuart)	Eucalyptus gomphocephala	WA	Southwest	0	0	0	0	0	0	0	0
E7	Gum topped box	Eucalyptus moluccana	NSW	Northern Rivers	0	0	0	0	0	0	0	0
E8	Mixed eucalypt	Eucalyptus spp.	QLD	Darling Downs and Granite Belt	0	0	0	0	0	0	0	0
E9	Mixed eucalypt	Eucalyptus pilularis, E. microcorys, E. tereticornis	QLD	Southeast Coast	18.7	19.2	19	0.4	0	0	0	0
E10	Eucalyptus celastroides	Eucalyptus celastroides	WA	Goldfields	0	0	0	0	0	0	0	0
E11	Mixed eucalypt	Eucalyptus paniculata, E. sieberi, E. bosistoana, E. agglomerata	NSW	South Coast	22.7	19.1	20.9	2.5	0	0	0	0
E12	Mixed eucalypt	Eucalyptus numerosa, E. paniculata, E. tereticornis	NSW	South Coast	0	0	0	0	0	0	0	0
E13	Mixed eucalypt	Eucalyptus spp.	WA	Goldfields	0	0	0	0	0	0	0	0
E14	Mixed eucalypt	Eucalyptus spp.	WA	Goldfields	0	0	0	0	0	0	0	0
EB1	Eastern berry	Leptecophylla divaricata	TAS	East Coast	14.6	16.7	15.7	1.5	0	0	0	0
EB2	East coast pink berry	Leptecophylla divaricata	TAS	East Coast	0	0	0	0	0	0	0	0
ET1	Grey ironbark, turpentine, eriostemon	Eucalyptus paniculata, Syncarpia glomulifera, Eriostemon sp.	NSW	Illawarra	25.6	25.7	25.7	0.1	0	0	0	0
FB1	Feather bush	Micromyrtus ciliata	NSW	Central West Slopes and Plains	12.6	14.6	13.6	1.4	0	0	0	0
FB2	Feather bush	Micromyrtus ciliata	NSW	Central West Slopes and Plains	11.3	11.6	11.5	0.2	0	0	0	0
FB3	Feather bush	Micromyrtus ciliata	NSW	Central West Slopes and Plains	0	0	0	0	0	0	0	0
FL1	Flatweed/ Leptospermum	Leptospermum flavescens, Hypochoeris radicata	NSW	Northern Tablelands	0	0	0	0	0	0	0	0
GB1	Grey box	Eucalyptus moluccana	QLD	North Tropical Coast and Tablelands	0	0	0	0	0	0	0	0
GB2	Grey box	Eucalyptus bosistoana	VIC	Central	17.3	16.5	16.9	0.6	0	0	0	0
GB3	Goo bush	Thryptomene hexandra	NSW	Upper Western	0	0	0	0	0	0	0	0
GB4	Grey box	Eucalyptus microcarpa	NSW	Central Tablelands	0	0	0	0	0	0	0	0
GT1	Golden thistle	Scolymus hispanicus	NSW	Central Tablelands	13.1	14.9	14	1.3	0	0	0	0
HB1	Heather bush	Thryptomene micrantha	NSW	Unknown	0	0	0	0	0	0	0	0
HB2	Heather bush	Thryptomene micrantha	NSW	Central West Slopes and Plains	0	0	0	0	0	0	0	0
HB3	Heather bush	Thryptomene micrantha	NSW	Central West Slopes and Plains	0	0	0	0	0	0	0	0
HB4	Heather bush/ Bimble box	Thryptomene micrantha/Eucalyptus populnea	NSW	Upper Western	0	0	0	0	0	0	0	0
HE1	Coastal heath and eucalypt	Eucalyptus sp. and unknown	QLD	North Tropical Coast and Tablelands	21.5	19.4	20.5	1.5	0	0	0	0
HG1	Hill gum	Eucalyptus dealbata	NSW	Southern Tablelands	0	0	0	0	0	0	0	0
I1	Isopogon	Isopogon sp.	WA	Central West	10.8	12.1	11.5	0.9	0	0	0	0
IB2	Broad leafed ironbark	Eucalyptus fibrosa	NSW	Central Tablelands	18.2	16.5	17.4	1.2	0	0	0	0
IB3	Mugga Ironbark	Eucalyptus sideroxylon	NSW	Central West Slopes and Plains	11.4	11.9	11.7	0.4	0	0	0	0
IB4	Grey ironbark	Eucalyptus paniculata	NSW	Mid North Coast	15.5	14.9	15.2	0.4	0	0	0	0
IB5	Ironbark/Red bloodwood	Eucalyptus tricarpa, E. gummifera	NSW	South Coast	19.3	20.7	20	1	0	0	0	0
IB6	Grey ironbark	Eucalyptus paniculata	NSW	South Coast	16.4	14.7	15.6	1.2	0	0	0	0
IB7	Mugga ironbark	Eucalyptus sideroxylon	NSW	South West Slopes	9.3	10.1	9.7	0.6	0	0	0	0
IB8	Red ironbark	Eucalyptus fibrosa	NSW	South Coast	0	0	0	0	0	0	0	0
IB9	Mugga ironbark	Eucalyptus sideroxylon	NSW	South West Slopes	11.1	13.5	12.3	1.7	0	0	0	0
IB10	Grey ironbark and broadleaf ironbark	Eucalyptus siderophloia, E. fibrosa	NSW	Northern Tablelands	19.9	18	19	1.3	0	0	0	0
IB11	Narrow leaf ironbark	Eucalyptus crebra	NSW	Northern Tablelands	0	0	0	0	0	0	0	0
IB12	Silver leaf ironbark, pink bloodwood	Eucalyptus melanophloia, E. intermedia	NSW	Northern Tablelands	22.4	20.8	21.6	1.1	0	0	0	0
IS1	Mugga ironbark, red sallee	Eucalyptus sideroxylon, Eucalyptus camphora	NSW	South West Slopes	0	0	0	0	0	0	0	0
J2	Jarrah	Eucalyptus marginata	WA	Lower West	27.6	27.8	27.7	0.1	0	0	0	0
J3	Jarrah	Eucalyptus marginata	WA	Lower West	23.5	22.3	22.9	0.8	0	0	0	0
J4	Jarrah	Eucalyptus marginata	WA	Lower West	24.5	23.7	24.1	0.6	0	0	0	0
J5	Jarrah	Eucalyptus marginata	WA	Lower West	25.8	25	25.4	0.6	0	0	0	0
J6	Jarrah	Eucalyptus marginata	WA	Lower West	0	0	0	0	0	0	0	0
J7	Jarrah	Eucalyptus marginata	WA	Lower West	24.1	26.3	25.2	1.6	0	0	0	0
J8	Jarrah	Eucalyptus marginata	WA	Lower West	24.1	26	25.1	1.3	0	0	0	0
J9	Jarrah	Eucalyptus marginata	WA	Lower West	23.1	23.1	23.1	0	0	0	0	0
J10	Jarrah	Eucalyptus marginata	WA	Lower West	25.2	26.2	25.7	0.7	0	0	0	0
J11	Jarrah	Eucalyptus marginata	WA	Lower West	27.9	26.7	27.3	0.8	0	0	0	0
J12	Jarrah	Eucalyptus marginata	WA	Lower West	24.5	24.8	24.7	0.2	0	0	0	0
J13	Jarrah	Eucalyptus marginata	WA	Lower West	28.2	28	28.1	0.1	0	0	0	0
J14	Jarrah	Eucalyptus marginata	WA	Lower West	30.9	31.9	31.4	0.7	0	0	0	0
J15	Jarrah	Eucalyptus marginata	WA	Southwest	18.2	17.1	17.7	0.8	0	0	0	0
J16	Jarrah	Eucalyptus marginata	WA	Lower West	20.7	19.5	20.1	0.8	0	0	0	0
J17	Jarrah	Eucalyptus marginata	WA	Lower West	17.9	18.7	18.3	0.6	0	0	0	0
J18	Jarrah	Eucalyptus marginata	WA	Lower West	18.8	18.6	18.7	0.1	0	0	0	0
J19	Jarrah	Eucalyptus marginata	WA	Great Southern	26.7	25.5	26.1	0.8	0	0	0	0
J20	Jarrah	Eucalyptus marginata	WA	Lower West	24.2	26.2	25.2	1.4	0	0	0	0
JB1	Jelly bush	Leptospermum sp.	QLD	Southeast Coast	11.2	11.6	11.4	0.3	11.6	11.5	11.6	0.1
JB5	Jelly bush	Leptospermum sp.	QLD	Southeast Coast	24.8	21.7	23.3	2.2	23	21.6	22.3	1
JB6	Jelly bush	Leptospermum sp.	QLD	Southeast Coast	26.1	22.7	24.4	2.4	24.9	22.3	23.6	1.8
JB7	Jelly bush	Leptospermum sp.	QLD	Southeast Coast	21.9	19.8	20.9	1.5	21.6	19.2	20.4	1.7
JB8	Jelly bush	Leptospermum sp.	NSW	Northern Rivers	24.1	27.5	25.8	2.4	23.4	26.6	25	2.3
JB9	Jelly bush	Leptospermum sp.	NSW	Northern Rivers	18.1	16.9	17.5	0.8	12.1	11.5	11.8	0.4
JB10	Jelly bush	Leptospermum sp.	NSW	Northern Rivers	16.1	17.8	17	1.2	13.9	15.2	14.6	0.9
JB11	Jelly bush	Leptospermum sp.	NSW	Northern Rivers	16.5	16.9	16.7	0.3	14.5	15.5	15	0.7
JB12	Jelly bush	Leptospermum sp.	NSW	Northern Rivers	17.5	18.5	18	0.7	14.7	14.4	14.6	0.2
JB13	Jelly bush	Leptospermum polygalifolium	NSW	Northern Rivers	13.7	12.9	13.3	0.6	0	0	0	0
JB14	Jelly bush	Leptospermum polygalifolium	NSW	Northern Rivers	16.4	16.4	16.4	0	16.4	15.9	16.2	0.4
JB15	Jelly bush	Leptospermum polygalifolium	NSW	Northern Rivers	17	17.4	17.2	0.3	17.2	16.9	17.1	0.2
JB16	Jelly bush	Leptospermum polygalifolium	NSW	Northern Rivers	15	15.4	15.2	0.3	15.8	15.5	15.7	0.2
JB17	Jelly bush	Leptospermum polygalifolium	NSW	Northern Rivers	15.9	15.4	15.7	0.4	15	15	15	0
JB18	Jelly bush	Leptospermum polygalifolium	NSW	Northern Rivers	15.7	16.8	16.3	0.8	15.5	15.7	15.6	0.1
JB19	Jelly bush	Leptospermum sp.	NSW	Northern Rivers	0	0	0	0	0	0	0	0
JB20	Jelly bush	Leptospermum polygalifolium	NSW	Northern Rivers	15.7	15.9	15.8	0.1	15	15.7	15.4	0.5
JB21	Jelly bush	Leptospermum polygalifolium	NSW	Northern Rivers	15.8	16	15.9	0.1	15	15.5	15.3	0.4
JB22	Jelly bush	Leptospermum polygalifolium	NSW	Northern Rivers	16.7	17.4	17.1	0.5	16.6	16	16.3	0.4
JB23	Jelly bush	Leptospermum polygalifolium	NSW	Northern Rivers	16.7	17.6	17.2	0.6	16.6	17.9	17.3	0.9
JB24	Jelly bush	Leptospermum polygalifolium	NSW	Northern Rivers	16.8	17.3	17.1	0.4	16.9	16.7	16.8	0.1
JB25	Jelly bush	Leptospermum polygalifolium	NSW	Northern Rivers	18.2	17.5	17.9	0.5	17.4	16.7	17.1	0.5
JB26	Jelly bush	Leptospermum polygalifolium	NSW	Northern Rivers	17.5	17.2	17.4	0.2	16.4	17	16.7	0.4
JB28	Jelly bush	Leptospermum polygalifolium	NSW	Northern Rivers	24.6	22.1	23.4	1.8	24.4	22.9	23.7	1.1
JB29	Jelly bush	Leptospermum polygalifolium	NSW	Northern Rivers	24.7	22.8	23.8	1.3	24.4	22.7	23.6	1.2
JB30	Jelly bush and heath	Leptospermum polygalifolium and unknown	NSW	Northern Rivers	20.6	18.9	19.8	1.2	17.9	17	17.5	0.6
JB31	Jelly bush and heath	Leptospermum polygalifolium and unknown	NSW	Northern Rivers	20.7	19.1	19.9	1.1	18.1	16.8	17.5	0.9
JB32	Jelly bush	Leptospermum polygalifolium	QLD	Capricornia	22.7	22	22.4	0.5	21	21.2	21.1	0.1
JB33	Jelly bush	Leptospermum sp.	SA	Murraylands	18.9	17.6	18.3	0.9	0	0	0	0
JB34	Jelly bush	Leptospermum polygalifolium	NSW	Northern Rivers	17.6	16.2	16.9	1	15.1	14.4	14.8	0.5
JB35	Jelly bush mix	Leptospermum polygalifolium and unknown	NSW	Northern Rivers	18	17.2	17.6	0.6	9.2	9.5	9.4	0.2
JM1	Jelly bush and macadamia	Leptospermum polygalifolium, Macadamia integrifolia	NSW	Northern Rivers	17.2	15.5	16.4	1.2	0	0	0	0
K1	Karri	Eucalyptus diversicolor	WA	Southwest	17.9	19	18.5	0.8	0	0	0	0
K2	Unknown		WA	Kimberley	12.2	13.7	13	1.1	0	0	0	0
K3	Karri	Eucalyptus diversicolor	WA	Southwest	30.3	28.9	29.6	1	0	0	0	0
K4	Unknown (Kimberley)		WA	Kimberley	10.4	9.4	9.9	0.7	8.9	8	8.5	0.6
KM1	Karri and mallee	Eucalyptus diversicolor and Eucalyptus sp.	WA	Southwest	23.5	21.8	22.7	1.2	0	0	0	0
L3	Leptospermum continentale	Leptospermum continentale	VIC	Central	0	0	0	0	0	0	0	0
L4	Leptospermum laevigatum	Leptospermum laevigatum	VIC	Central	0	0	0	0	0	0	0	0
L5	Leptospermum continentale	Leptospermum continentale	VIC	Central	7.9	10.6	9.3	1.9	0	0	0	0
L6	Leptospermum mix	Leptospermum polygalifolium and L. speciosum	NSW	Northern Rivers	14.8	14.5	14.7	0.2	14.8	14	14.4	0.6
L7	Leptospermum mix	Leptospermum polygalifolium and L. speciosum	NSW	Northern Rivers	13.3	14.6	14	0.9	13.5	14.8	14.2	0.9
L8	Leptospermum liversidgei	Leptospermum liversidgei	NSW	Northern Rivers	15.8	15.6	15.7	0.1	15.4	15.3	15.4	0.1
L9	Leptospermum liversidgei	Leptospermum liversidgei	NSW	Northern Rivers	13.5	14.4	14	0.6	12.7	12.7	12.7	0
L10	Lepto mix	Leptospermum polygalifolium, L. speciosum	NSW	Northern Rivers	14.8	14.3	14.6	0.4	14.6	14	14.3	0.4
L11	Leptospermum	Leptospermum liversidgei	NSW	Northern Rivers	23.6	25.4	24.5	1.3	23.3	23.8	23.6	0.4
L12	Leptospermum	Leptospermum liversidgei	NSW	Northern Rivers	16.8	15.8	16.3	0.7	15.8	14.9	15.4	0.6
L13	Leptospermum	Leptospermum liversidgei	NSW	Northern Rivers	14.2	15	14.6	0.6	13.2	13.5	13.4	0.2
L14	Leptospermum	Leptospermum polygalifolium	NSW	Northern Rivers	17.8	18.1	18	0.2	17	17.1	17.1	0.1
L15	Leptospermum	Leptospermum polygalifolium	NSW	Northern Rivers	15.3	15.1	15.2	0.1	13.8	14.4	14.1	0.4
L16	Lepto mix	Leptospermum polygalifolium, L. whitei	NSW	Northern Rivers	13.3	13.3	13.3	0	12.7	13.1	12.9	0.3
L17	Lepto mix	Leptospermum polygalifolium, L. whitei	NSW	Northern Rivers	14	13.8	13.9	0.1	13.4	13	13.2	0.3
L18	Leptospermum laevigatum	Leptospermum laevigatum	NSW	Northern Rivers	21.7	21	21.4	0.5	19.7	19.6	19.7	0.1
L19	Leptospermum laevigatum and unknown	Leptospermum laevigatum and unknown	NSW	Hunter	0	0	0	0	0	0	0	0
L20	Manuka tea tree	Leptospermum scoparium	TAS	South East Huon, Channel and Lower Derwent Valley	0	0	0	0	0	0	0	0
L21	Leptospermum polygalifolium	Leptospermum polygalifolium	NSW	Northern Rivers	25.6	22.3	24	2.3	26	22.6	24.3	2.4
L22	Leptospermum polygalifolium	Leptospermum polygalifolium	NSW	Northern Rivers	24.6	26.2	25.4	1.1	24.9	25.8	25.4	0.6
L23	Leptospermum polygalifolium	Leptospermum polygalifolium	NSW	Northern Rivers	26.1	26.1	26.1	0	25.7	26	25.9	0.2
L24	Leptospermum polygalifolium	Leptospermum polygalifolium	NSW	Northern Rivers	26.4	23.2	24.8	2.3	25.7	23.3	24.5	1.7
L25	Leptospermum and Melaleuca	Leptospermum semibaccatum, Melaleuca nodosa	NSW	Northern Rivers	18.5	17.6	18.1	0.6	16.2	15	15.6	0.8
L26	Leptospermum and Melaleuca	Leptospermum semibaccatum, Melaleuca nodosa	NSW	Northern Rivers	19.4	19.7	19.6	0.2	16.6	17	16.8	0.3
L27	Leptospermum and Melaleuca	Leptospermum semibaccatum, Melaleuca nodosa	NSW	Northern Rivers	18.8	19	18.9	0.1	16.8	16.6	16.7	0.1
L28	Leptospermum and Melaleuca	Leptospermum semibaccatum, Melaleuca nodosa	NSW	Northern Rivers	18.9	18.3	18.6	0.4	17.1	17.1	17.1	0
L29	Leptospermum polygalifolium	Leptospermum polygalifolium	NSW	Northern Rivers	23	22.6	22.8	0.3	23.4	23.1	23.3	0.2
L30	Leptospermum polygalifolium	Leptospermum polygalifolium	NSW	Northern Rivers	25.2	27.1	26.2	1.3	25.1	26.4	25.8	0.9
L31	Leptospermum polygalifolium	Leptospermum polygalifolium	NSW	Northern Rivers	21.1	22.3	21.7	0.8	18.8	19	18.9	0.1
L32	Leptospermum polygalifolium	Leptospermum polygalifolium	NSW	Northern Rivers	20.3	20.6	20.5	0.2	18.5	17.9	18.2	0.4
L33	Leptospermum polygalifolium	Leptospermum polygalifolium	NSW	Northern Rivers	22.9	21.4	22.2	1.1	19.4	18.8	19.1	0.4
L34	Leptospermum polygalifolium	Leptospermum polygalifolium	NSW	Northern Rivers	22.2	20	21.1	1.6	19.4	17	18.2	1.7
L35	Coastal tea tree	Leptospermum laevigatum	VIC	Central	0	0	0	0	0	0	0	0
L36	Leptospermum scoparium	Leptospermum scoparium	TAS	North East and Flinders Island	16.4	15.9	16.2	0.4	0	0	0	0
L37	Leptospermum scoparium	Leptospermum scoparium	TAS	North East and Flinders Island	12.1	12.3	12.2	0.1	0	0	0	0
L38	Leptospermum scoparium	Leptospermum scoparium	TAS	North East and Flinders Island	12.9	13.2	13.1	0.2	0	0	0	0
L39	Leptospermum scoparium	Leptospermum scoparium	TAS	North East and Flinders Island	0	0	0	0	0	0	0	0
L40	Leptospermum scoparium	Leptospermum scoparium	TAS	North East and Flinders Island	13.2	11.7	12.5	1.1	0	0	0	0
L41	Leptospermum scoparium	Leptospermum scoparium	TAS	North East and Flinders Island	16.3	15.4	15.9	0.6	0	0	0	0
L42	Leptospermum scoparium	Leptospermum scoparium	TAS	North East and Flinders Island	11.1	11.7	11.4	0.4	0	0	0	0
L43	Leptospermum scoparium	Leptospermum scoparium	TAS	North East and Flinders Island	14	14.6	14.3	0.4	0	0	0	0
L44	Leptospermum scoparium	Leptospermum scoparium	TAS	North East and Flinders Island	16.6	15.9	16.3	0.5	0	0	0	0
L45	Leptospermum scoparium	Leptospermum scoparium	TAS	North East and Flinders Island	12.7	14.1	13.4	1	0	0	0	0
L46	Leptospermum	Leptospermum sp.	NSW	Northern Tablelands	20	18.9	19.5	0.8	0	0	0	0
L47	Lucerne	Medicago sativa	SA	Upper South East	0	0	0	0	0	0	0	0
LB1	Lepto/Coastal bloodwood	Leptospermum liversidgei/ Eucalyptus spp.	NSW	Northern Rivers	13.3	14.1	13.7	0.6	0	0	0	0
LB2	Lepto/ Coastal bloodwood	Leptospermum liversidgei/ Eucalyptus spp.	NSW	Northern Rivers	12.1	10.9	11.5	0.8	0	0	0	0
LB3	Lepto/ Coastal bloodwood	Leptospermum liversidgei/ Eucalyptus spp.	NSW	Northern Rivers	14.7	13.5	14.1	0.8	0	0	0	0
LB4	Lepto/ Coastal bloodwood	Leptospermum liversidgei/ Eucalyptus spp.	NSW	Northern Rivers	0	0	0	0	0	0	0	0
LB5	Lepto/ Coastal bloodwood	Leptospermum liversidgei/ Eucalyptus spp.	NSW	Northern Rivers	15	14.3	14.7	0.5	0	0	0	0
LB6	Lepto/ Coastal bloodwood	Leptospermum liversidgei/ Eucalyptus spp.	NSW	Northern Rivers	0	0	0	0	0	0	0	0
LB7	Lepto/ Coastal bloodwood	Leptospermum liversidgei/ Eucalyptus spp.	NSW	Northern Rivers	15	13.6	14.3	1	0	0	0	0
LB8	Lepto/ Coastal bloodwood	Leptospermum liversidgei/ Eucalyptus spp.	NSW	Northern Rivers	13.3	14.4	13.9	0.8	0	0	0	0
LB9	Lepto/ Coastal bloodwood	Leptospermum liversidgei/ Eucalyptus spp.	NSW	Northern Rivers	0	0	0	0	0	0	0	0
LB10	Lepto/Coastal bloodwood	Leptospermum liversidgei/ Eucalyptus spp.	NSW	Northern Rivers	13.5	12	12.8	1.1	0	0	0	0
LB11	Lepto/Coastal bloodwood	Leptospermum liversidgei/ Eucalyptus spp.	NSW	Northern Rivers	0	0	0	0	0	0	0	0
LB12	Lepto/ Bloodwood	Leptospermum liversidgei/ Eucalyptus intermedia	NSW	Northern Rivers	12.9	13.6	13.3	0.5	11.1	11.2	11.2	0.1
LB13	Leptospermum, pink bloodwood, mangrove	Leptospermum liversidgei, Eucalyptus intermedia, mangrove	NSW	Northern Rivers	0	0	0	0	0	0	0	0
LB14	Lepto liversidgei, pink bloodwood	Leptospermum liversidgei, Eucalyptus intermedia	NSW	Northern Rivers	0	0	0	0	0	0	0	0
LB15	Lepto liversidgei, pink bloodwood	Leptospermum liversidgei, Eucalyptus intermedia	NSW	Northern Rivers	0	0	0	0	0	0	0	0
LB16	L. liversidgei, pink bloodwood	Leptospermum liversidgei, Eucalyptus intermedia	NSW	Northern Rivers	12.9	12.5	12.7	0.3	12	12	12	0
LB17	L. liversidgei, pink bloodwood	Leptospermum liversidgei, Eucalyptus intermedia	NSW	Northern Rivers	14.1	15.1	14.6	0.7	13.2	14.6	13.9	1
LB18	L. liversidgei, pink bloodwood	Leptospermum liversidgei, Eucalyptus intermedia	NSW	Northern Rivers	0	0	0	0	0	0	0	0
LM1	Lemon myrtle	Backhousia citriodora	NSW	Northern Rivers	17.1	18.6	17.9	1.1	0	0	0	0
LM2	Lepto and Melaleuca	Leptospermum laevigatum, Melaleuca nodosa	NSW	Northern Rivers	0	0	0	0	0	0	0	0
LM3	Lepto and Melaleuca	Leptospermum laevigatum, Melaleuca nodosa	NSW	Northern Rivers	0	0	0	0	0	0	0	0
LM4	Lepto and Melaleuca	Leptospermum laevigatum, Melaleuca nodosa	NSW	Northern Rivers	15.6	15.1	15.4	0.4	0	0	0	0
LM5	Lepto and Melaleuca	Leptospermum laevigatum, Melaleuca nodosa	NSW	Northern Rivers	16.9	15.6	16.3	0.9	0	0	0	0
LM6	Lepto and mangrove	Leptospermum liversidgei, Aegicerus corniculatum	NSW	Northern Rivers	16.3	17.2	16.8	0.6	16.1	16.2	16.2	0.1
LM7	Lepto and mangrove	Leptospermum liversidgei, Aegicerus corniculatum	NSW	Northern Rivers	16.4	17.9	17.2	1.1	16.1	16.9	16.5	0.6
LW1	Leatherwood	Eucryphia lucida	TAS	West and South Coast and Highlands	12.6	12.2	12.4	0.3	0	0	0	0
LW2	Leatherwood	Eucryphia lucida	TAS	West and South Coast and Highlands	9.8	11.4	10.6	1.1	0	0	0	0
LW3	White gum/ Leatherwood	Eucalyptus viminalis/Eucryphia lucida	TAS	West and South Coast and Highlands	0	0	0	0	0	0	0	0
LW4	Leatherwood	Eucryphia lucida	TAS	West and South Coast and Highlands	0	0	0	0	0	0	0	0
LW5	Leatherwood	Eucryphia lucida	TAS	West and South Coast and Highlands	0	0	0	0	0	0	0	0
LW6	Leatherwood	Eucryphia lucida	TAS	West and South Coast and Highlands	0	0	0	0	0	0	0	0
LW7	Leatherwood	Eucryphia lucida	TAS	West and South Coast and Highlands	0	0	0	0	0	0	0	0
LW8	Leatherwood	Eucryphia lucida	TAS	Northwest Coast and King Island	0	0	0	0	0	0	0	0
LW9	Leatherwood	Eucryphia lucida	TAS	Northwest Coast and King Island	16.7	17.5	17.1	0.6	0	0	0	0
LW10	Leatherwood	Eucryphia lucida	TAS	West and South Coast and Highlands	17.2	17.8	17.5	0.4	0	0	0	0
LW11	Leatherwood	Eucryphia lucida and Eucryphia milliganni	TAS	West and South Coast and Highlands	14.1	15.8	15	1.2	0	0	0	0
LW12	Leatherwood	Eucryphia lucida	TAS	West and South Coast and Highlands	0	0	0	0	0	0	0	0
LW13	Leatherwood	Eucryphia lucida and milligannii	TAS	Unknown	0	0	0	0	0	0	0	0
LW14	Leatherwood	Eucryphia lucida	TAS	Unknown	12.2	13.3	12.8	0.8	0	0	0	0
LY1	Lepto/Yellow box	Leptospermum sp./ Eucalyptus melliodora	NSW	Northern Tablelands	0	0	0	0	0	0	0	0
LY2	Lepto/Yellow box	Leptospermum sp., Eucalyptus melliodora	NSW	Northern Tablelands	0	0	0	0	0	0	0	0
LY3	Lepto/Yellow box	Leptospermum sp., Eucalyptus melliodora	NSW	Northern Tablelands	0	0	0	0	0	0	0	0
M9	Red Mallee	Eucalyptus oleosa	NSW	Lower Western	0	0	0	0	0	0	0	0
M10	Red Mallee	Eucalyptus oleosa	NSW	Central West Slopes and Plains	0	0	0	0	0	0	0	0
M11	Mallee	Eucalyptus sp.	NSW	Central West Slopes and Plains	0	0	0	0	0	0	0	0
M12	Red mallee	Eucalyptus socialis and Eucalyptus populnea	NSW	Central West Slopes and Plains	0	0	0	0	0	0	0	0
M13	Red mallee	Eucalyptus socialis	NSW	Central West Slopes and Plains	0	0	0	0	0	0	0	0
M15	Macadamia	Macadamia integrifolia	QLD	Wide Bay and Burnett	0	0	0	0	0	0	0	0
M16	Melaleuca	Melaleuca sp.	WA	Unknown	13.5	15.2	14.4	1.2	0	0	0	0
M17	Melaleuca	Melaleuca sp.	WA	Kimberley	13.8	15.1	14.5	0.9	9	10.3	9.7	0.9
M18	Macadamia	Macadamia integrifolia	NSW	Northern Rivers	0	0	0	0	0	0	0	0
M19	Macadamia	Macadamia integrifolia	QLD	North Tropical Coast and Tablelands	0	0	0	0	0	0	0	0
M20	Mulla mulla	Ptilotus rotundifolius	WA	Pilbara	0	0	0	0	0	0	0	0
M21	Mallee	Eucalyptus sp.	SA	Riverland	0	0	0	0	0	0	0	0
M22	Red mallee	Eucalyptus socialis or oleosa	NSW	Central West Slopes and Plains	0	0	0	0	0	0	0	0
M23	Coastal moort	Eucalyptus platypus	WA	Lower West	13.2	14.9	14.1	1.2	8.9	9	9	0.1
M24	Mallee (several species)	Eucalyptus spp.	WA	Goldfields	0	0	0	0	0	0	0	0
M25	Coastal/white mallee	Eucalyptus diversifolia	SA	Murraylands	0	0	0	0	0	0	0	0
M26	Big cup mallee	Eucalyptus incrassata	SA	Murraylands	0	0	0	0	0	0	0	0
M27	Messmate	Eucalyptus obliqua	NSW	Northern Tablelands	10.6	9.9	10.3	0.5	0	0	0	0
M28	Melaleuca	Melaleuca sp.	WA	Kimberley	18.8	18.6	18.7	0.1	0	0	0	0
MB1	Melaleuca, brush box	Lophostemon confertus, Melaleuca sp.	NSW	Hunter	19.6	21.1	20.4	1.1	11.2	9.9	10.6	0.9
MC1	Macadamia and Crows ash	Macadamia integrifolia, Guioa semiglauca	NSW	Northern Rivers	0	0	0	0	0	0	0	0
MC2	Red mallee, Paterson's curse	Eucalyptus oleosa, Echium plantagineum	NSW	South West Slopes	9.2	10.1	9.7	0.6	0	0	0	0
MG1	Mixed gum	Eucalyptus spp.	VIC	Northeast	17.3	18.7	18	1	0	0	0	0
MH1	Mangrove and coastal heath	Aegericus and unknown	QLD	North Tropical Coast and Tablelands	0	0	0	0	0	0	0	0
MH2	Mangrove and heath	Aegiceras corniculatum and unknown	QLD	Southeast Coast	15.5	15.9	15.7	0.3	0	0	0	0
ML1	Manuka/ Leatherwood	Leptospermum scoparium/ Eucryphia lucida	TAS	West and South Coast and Highlands	0	0	0	0	0	0	0	0
N1	Napunyah	Eucalyptus ochrophloia	QLD	Maranoa and Warrego	0	0	0	0	0	0	0	0
N2	Napunyah	Eucalyptus ochrophloia	QLD	Southeast Coast	0	0	0	0	0	0	0	0
O1	Orchard	Prunus persica, Prunus sp., Plumeria sp.	WA	Lower West	33.5	30.2	31.9	2.3	9.2	8.9	9.1	0.2
O2	Orchard and natives	Prunus spp., Eucalyptus marginata, Eucalyptus calophylla	WA	Lower West	19.3	17.4	18.4	1.3	0	0	0	0
OB1	Orange blossom	Citrus sp.	SA	Riverland	0	0	0	0	0	0	0	0
P3	Mixed urban	Banksia sp., Eucalyptus	WA	Lower West	9.7	11.1	10.4	1	0	0	0	0
P4	Mixed urban		WA	Lower West	0	0	0	0	0	0	0	0
P5	Mixed garden flora		VIC	Central	26.5	24.7	25.6	1.3	0	0	0	0
P6	Garden flora/ Prickly box		TAS	Central North and Midlands	0	0	0	0	0	0	0	0
P7	Mixed		NSW	Metropolitan	15.7	15.8	15.8	0.1	0	0	0	0
P8	Mixed		NSW	Metropolitan	15.1	17.6	16.4	1.8	0	0	0	0
P9	Mixed		NSW	Metropolitan	17.1	16.9	17	0.1	0	0	0	0
P10	Mixed		QLD	Southeast Coast	22.1	21.1	21.6	0.7	9.8	10.1	10	0.2
P11	Mixed		QLD	Southeast Coast	13.7	13.9	13.8	0.1	0	0	0	0
P12	Mixed		NSW	Metropolitan	19.3	19.5	19.4	0.1	0	0	0	0
P13	Mixed		NSW	Metropolitan	20.6	21.7	21.2	0.8	0	0	0	0
P14	Mixed urban		NSW	Metropolitan	15.4	16.6	16	0.8	0	0	0	0
P15	Mixed urban		NSW	Metropolitan	17	15.8	16.4	0.8	0	0	0	0
P16	Mixed urban		NSW	Metropolitan	23.4	22.9	23.2	0.4	0	0	0	0
P17	Mixed		NSW	Metropolitan	0	0	0	0	0	0	0	0
P18	Mixed		NSW	Metropolitan	0	0	0	0	0	0	0	0
P19	Mixed		NSW	Hunter	0	0	0	0	0	0	0	0
P20	Mixed		NSW	Metropolitan	0	0	0	0	0	0	0	0
P21	Mixed		NSW	Metropolitan	0	0	0	0	0	0	0	0
P22	Mixed		NSW	Metropolitan	0	0	0	0	0	0	0	0
P23	Mixed		NSW	Hunter	18.5	18.1	18.3	0.3	0	0	0	0
P24	Mixed		NSW	Hunter	19.5	18.3	18.9	0.8	0	0	0	0
P25	Mixed		NSW	Metropolitan	13.5	14.1	13.8	0.4	0	0	0	0
P26	Mixed		NSW	Metropolitan	16.8	14.6	15.7	1.6	0	0	0	0
P27	Mixed		NSW	Metropolitan	0	0	0	0	0	0	0	0
P28	Mixed		NSW	Metropolitan	14.4	15.6	15	0.8	0	0	0	0
P29	Mixed		NSW	Metropolitan	29.6	30	29.8	0.3	0	0	0	0
P30	Mixed		NSW	Metropolitan	21.8	23.5	22.7	1.2	0	0	0	0
P31	Mixed		NSW	Metropolitan	9.2	7	8.1	1.6	0	0	0	0
P32	Mixed		NSW	Metropolitan	22.2	21.8	22	0.3	0	0	0	0
P33	Mixed		NSW	Mid North Coast	24.7	24.4	24.6	0.2	0	0	0	0
P34	Mixed		NSW	Metropolitan	16.1	17.9	17	1.3	0	0	0	0
P35	Mixed		NSW	Metropolitan	22.2	19.7	21	1.8	0	0	0	0
P36	Ground flora, white clover		TAS	Central North and Midlands	0	0	0	0	0	0	0	0
P37	Mixed		TAS	West and South Coast and Highlands	0	0	0	0	0	0	0	0
P38	Paulownia	Paulownia tomentosa or fortunei	WA	Unknown	0	0	0	0	0	0	0	0
P39	Mixed		NSW	Illawarra	8.9	8.8	8.9	0.1	8.2	8	8.1	0.1
P40	Mixed		NSW	Metropolitan	0	0	0	0	0	0	0	0
P41	Mixed		NSW	Metropolitan	13.5	14.1	13.8	0.4	0	0	0	0
P42	Mixed		NSW	Central Tablelands	16.9	18.6	17.8	1.2	0	0	0	0
P43	Mixed		NSW	Central Tablelands	15	15.1	15.1	0.1	0	0	0	0
P44	Mixed		WA	Lower West	0	0	0	0	0	0	0	0
P45	Mixed		WA	Lower West	18.4	18.3	18.4	0.1	0	0	0	0
P46	Mixed		WA	Lower West	23	22.3	22.7	0.5	0	0	0	0
P47	Mixed natives		WA	Lower West	0	0	0	0	0	0	0	0
P48	Mixed		WA	Lower West	20.8	23.5	22.2	1.9	0	0	0	0
P49	Mixed		WA	Lower West	20.5	21.5	21	0.7	0	0	0	0
PB1	Paperbark	Melaleuca sp.	NSW	Metropolitan	20	19.2	19.6	0.6	0	0	0	0
PB2	WA Parrot bush	Dryandra sessilis	WA	Lower West	0	0	0	0	0	0	0	0
PB3	Powderbark	Eucalyptus accedens	WA	Central West	0	0	0	0	0	0	0	0
PB4	Powderbark	Eucalyptus accedens	WA	Central West	0	0	0	0	0	0	0	0
PB5	Prickly box	Bursaria spinosa	TAS	South East Huon, Channel and Lower Derwent Valley	0	0	0	0	0	0	0	0
PB6	Prickly box	Bursaria spinosa	TAS	South East Huon, Channel and Lower Derwent Valley	17.2	17.4	17.3	0.1	0	0	0	0
PB7	Paperbark	Melaleuca linarifolia	NSW	Illawarra	22.7	19.4	21.1	2.3	0	0	0	0
PB8	Powderbark	Eucalyptus accedens	WA	Central West	0	0	0	0	0	0	0	0
PB9	WA parrotbush	Dryandra sessilis	WA	Unknown	0	0	0	0	0	0	0	0
PB10	Parrot bush	Dryandra sessilis	WA	Lower West	23.8	21.8	22.8	1.4	0	0	0	0
PG1	Pink gum	Eucalyptus fasciculosa	SA	Unknown	0	0	0	0	0	0	0	0
PM1	WA Peppermint tree	Agonis flexuosa	WA	Unknown	0	0	0	0	0	0	0	0
PM2	WA Peppermint	Agonis flexuosa	WA	Unknown	7.9	7.8	7.9	0.1	0	0	0	0
PR1	Pennyroyal	Mentha pulegium	WA	Southwest	17.1	16.7	16.9	0.3	0	0	0	0
R1	River red gum	Eucalyptus camaldulensis	NSW		0	0	0	0	0	0	0	0
R2	Red gum (marri)	Eucalyptus calophylla	WA	Unknown	0	0	0	0	0	0	0	0
R3	Rainforest mix		QLD	North Tropical Coast and Tablelands	0	0	0	0	0	0	0	0
R4	Rainforest mix		QLD	North Tropical Coast and Tablelands	0	0	0	0	0	0	0	0
R5	Redgum (marri)	Eucalyptus calophylla	WA	Unknown	18.5	17.4	18	0.8	0	0	0	0
R6	Redgum (marri)	Eucalyptus calophylla	WA	Lower West	27.7	29.4	28.6	1.2	0	0	0	0
R7	Redgum (marri)	Eucalyptus calophylla	WA	Lower West	23.2	25.2	24.2	1.4	0	0	0	0
R8	Redgum (marri)	Eucalyptus calophylla	WA	Lower West	27.4	27	27.2	0.3	0	0	0	0
R9	Redgum (marri)	Eucalyptus calophylla	WA	Lower West	19.4	21.3	20.4	1.3	0	0	0	0
R10	Redgum (marri)	Eucalyptus calophylla	WA	Lower West	28.1	30.5	29.3	1.7	0	0	0	0
R11	Redgum (marri)	Eucalyptus calophylla	WA	Lower West	29.7	29.6	29.7	0.1	0	0	0	0
RB1	Molloy red box	Eucalyptus leptophleba	QLD	North Tropical Coast and Tablelands	0	0	0	0	0	0	0	0
RG1	Forest red gum	Eucalyptus tereticornis	NSW	South Coast	23	25.2	24.1	1.6	12	10.4	11.2	1.1
RM1	Red mahogany	Eucalyptus resinifera	QLD	North Tropical Coast and Tablelands	0	0	0	0	0	0	0	0
RP1	Redgum (marri), powderbark	Eucalyptus calophylla, Eucalyptus accedens	WA	Lower West	26.1	24.2	25.2	1.3	0	0	0	0
RS1	Red sallee	Eucalyptus camphora	NSW	South West Slopes	0	0	0	0	0	0	0	0
S1	Sunflower	Helianthus annuus	QLD	Central Highlands Coalfields	0	0	0	0	0	0	0	0
SB2	Red stringybark	Eucalyptus macrorhynca	NSW	Central Tablelands	0	0	0	0	0	0	0	0
SB3	Silver top stringy bark	Eucalyptus laevopinea	NSW	Northern Tablelands	15.2	14.1	14.7	0.8	0	0	0	0
SB4	Stringy bark	Eucalyptus baxteri or obliqua	SA	Kangaroo Island	17.3	18.5	17.9	0.8	0	0	0	0
SB5	Scent bark	Eucalyptus aromaphloia	VIC	Western	0	0	0	0	0	0	0	0
SB6	Red stringybark	Eucalyptus macrorhynca	NSW	Central Tablelands	0	0	0	0	0	0	0	0
SB7	Red stringybark	Eucalyptus macrorhynca	NSW	South West Slopes	24.4	26.2	25.3	1.3	0	0	0	0
SB8	Red stringybark	Eucalyptus macrorhynca	VIC	Northeast	23.8	25.4	24.6	1.1	0	0	0	0
SB9	Red stringybark	Eucalyptus macrorhynca	VIC	East Gippsland	0	0	0	0	0	0	0	0
SB10	Red stringybark	Eucalyptus macrorhynca	VIC	Wimmera	0	0	0	0	0	0	0	0
SB11	Red stringybark	Eucalyptus macrorhynca	VIC	North Central	22.2	24.3	23.3	1.5	0	0	0	0
SB12	Messmate stringybark	Eucalyptus obliqua	TAS	Unknown	0	0	0	0	0	0	0	0
SB13	Stringybark	Eucalyptus obliqua	TAS	South East Huon, Channel and Lower Derwent Valley	9.2	10.4	9.8	0.8	0	0	0	0
SB14	Red stringybark	Eucalyptus macrorhynca	NSW	Central Tablelands	25.9	24.4	25.2	1.1	0	0	0	0
SB15	White stringybark	Eucalyptus globoidea	NSW	South Coast	14.8	12.4	13.6	1.7	0	0	0	0
SB16	Red stringybark	Eucalyptus macrorhyncha	NSW	South West Slopes	15.4	15.2	15.3	0.1	0	0	0	0
SB17	Spotted gum, bloodwood	Eucalyptus maculata, Eucalyptus gummifera	NSW	South Coast	0	0	0	0	0	0	0	0
SB18	Stringybark	Eucalyptus obliqua	SA	Greater Adelaide and Mount Lofty Ranges	15.7	14.7	15.2	0.7	9.3	8.7	9	0.4
SB19	Stringybark	Eucalyptus obliqua	NSW	Northern Tablelands	26.1	23.7	24.9	1.7	0	0	0	0
SF1	Spring flora		SA	Kangaroo Island	0	0	0	0	0	0	0	0
SG1	Spotted gum	Eucalyptus maculata	NSW	South Coast	26.3	23.9	25.1	1.7	10	10.1	10.1	0.1
SG2	Sugar gum	Eucalyptus cladocalyx	SA	Kangaroo Island	18.2	18.5	18.4	0.2	0	0	0	0
SG3	Spotted gum	Eucalyptus maculata	NSW	South Coast	23.3	21.5	22.4	1.3	10.4	10.2	10.3	0.1
SG4	Spotted gum	Eucalyptus maculata	NSW	South Coast	18.6	15.3	17	2.3	9	9.1	9.1	0.1
SG5	Snow gum	Eucalyptus pauciflora	NSW	Southern Highlands	8.4	8.9	8.7	0.4	0	0	0	0
SG6	Snow gum	Eucalyptus pauciflora	NSW	South West Slopes	9.9	12.1	11	1.6	0	0	0	0
SG7	Spotted gum	Eucalyptus maculata	NSW	South Coast	14.8	14.5	14.7	0.2	10.1	9.6	9.9	0.4
SG8	Snow gum	Eucalyptus pauciflora	NSW	Southern Tablelands	0	0	0	0	0	0	0	0
SJ1	Salvation Jane	Echium plantagineum	NSW	Central West Slopes and Plains	0	0	0	0	0	0	0	0
SJ2	Salvation Jane	Echium plantagineum	NSW	South West Slopes	13.7	11.5	12.6	1.6	0	0	0	0
SJ3	Salvation Jane	Echium plantagineum	NSW	South West Slopes	16.3	14.9	15.6	1	0	0	0	0
SJ4	Salvation Jane	Echium plantagineum	NSW	South West Slopes	0	0	0	0	0	0	0	0
SS1	Spotted gum, stringybark	Eucalyptus maculata, Eucalyptus laevopinea?	NSW	Northern Tablelands	22.8	21.7	22.3	0.8	0	0	0	0
T1	Ti tree	Leptospermum sp. or Melaleuca sp.	VIC	Western	0	0	0	0	0	0	0	0
T2	Ti tree	Leptospermum sp. or Melaleuca sp.	VIC	Western	8.6	11.1	9.9	1.8	0	0	0	0
T3	Tea tree	Melaleuca quinquenervia	QLD	Southeast Coast	23	20.8	21.9	1.6	0	0	0	0
T4	Coastal tea tree	Melaleuca quinquenervia	WA	Kimberley	0	0	0	0	0	0	0	0
T5	Tea tree	Melaleuca quinquenervia	NSW	Northern Rivers	7.8	6.9	7.4	0.6	0	0	0	0
T6	Tea tree and others	Leptospermum sp.	NSW	Illawarra	6.8	9.1	8	1.6	0	0	0	0
T7	Common tea tree	Leptospermum flavescens	NSW	Illawarra	15	16.7	15.9	1.2	0	0	0	0
T8	Tea tree	Leptospermum sp. or Melaleuca sp.	NSW	Mid North Coast	0	0	0	0	0	0	0	0
T9	Coastal tea tree	Leptospermum sp.	NSW	Metropolitan	0	0	0	0	0	0	0	0
T10	Turpentine	Syncarpia glomulifera	NSW	Illawarra	23.6	25.8	24.7	1.6	0	0	0	0
T11	Tea tree	Melaleuca sp.	NSW	Illawarra	10.6	11	10.8	0.3	0	0	0	0
T12	Tea tree	Melaleuca sp.	NSW	Illawarra	13.2	13.1	13.2	0.1	0	0	0	0
T13	Tea tree	Melaleuca sp.	NSW	Illawarra	0	0	0	0	0	0	0	0
T14	Tea tree	Melaleuca sp.	NSW	Illawarra	12	9.8	10.9	1.6	0	0	0	0
T15	Tea tree	Melaleuca sp.	NSW	Illawarra	14.1	12.2	13.2	1.3	0	0	0	0
T16	Tea tree	Melaleuca sp.	NSW	Illawarra	12.3	12.1	12.2	0.1	0	0	0	0
T17	Tea tree	Melaleuca sp.	NSW	Illawarra	13.5	13.9	13.7	0.3	0	0	0	0
T18	Tea tree	Melaleuca sp.	NSW	Illawarra	12.9	12.9	12.9	0	0	0	0	0
T19	Tea tree	Melaleuca sp.	NSW	Illawarra	0	0	0	0	0	0	0	0
T20	Tea tree	Melaleuca sp.	NSW	Illawarra	11.9	12.4	12.2	0.4	0	0	0	0
T21	Tea tree	Melaleuca sp.	NSW	Illawarra	13	12.2	12.6	0.6	0	0	0	0
T22	Tea tree	Melaleuca sp.	NSW	Illawarra	13.5	12.4	13	0.8	0	0	0	0
T23	Tea tree	Melaleuca sp.	NSW	Illawarra	11.2	12	11.6	0.6	0	0	0	0
T24	Tea tree	Melaleuca sp.	NSW	Illawarra	11.8	10	10.9	1.3	0	0	0	0
T25	Tea tree	Melaleuca sp.	NSW	Illawarra	0	0	0	0	0	0	0	0
T26	Tea tree	Melaleuca sp.	NSW	Illawarra	0	0	0	0	0	0	0	0
T27	Tea tree	Melaleuca sp.	NSW	Illawarra	12.5	13.4	13	0.6	0	0	0	0
T28	Tea tree	Melaleuca sp.	NSW	Illawarra	13.7	14.8	14.3	0.8	0	0	0	0
T29	Tuart	Eucalyptus gomphocephala	WA	Southwest	0	0	0	0	0	0	0	0
TI1	Turpentine/ Grey ironbark	Syncarpia glomulifera, Eucalyptus crebra	NSW	Illawarra	0	0	0	0	0	0	0	0
TL1	Tree lucerne	Chamaecytisus palmensis	WA	Unknown	0	0	0	0	0	0	0	0
U1	Unknown		NSW	Metropolitan	20.3	18.4	19.4	1.3	0	0	0	0
U2	Unknown		NSW	Metropolitan	23.2	21.4	22.3	1.3	0	0	0	0
U3	Unknown		NSW	Metropolitan	9.6	13.4	11.5	2.7	9.6	9.1	9.4	0.4
U4	Unknown		NSW	Metropolitan	17.8	15.6	16.7	1.6	0	0	0	0
U5	Unknown		NSW	Metropolitan	11.6	11.7	11.7	0.1	10.1	10.3	10.2	0.1
U6	Unknown		NSW	Hunter	0	0	0	0	0	0	0	0
U10	Unknown		NSW	Illawarra	0	0	0	0	0	0	0	0
U11	Unknown		NSW	Illawarra	0	0	0	0	0	0	0	0
U12	Unknown		NSW	Metropolitan	16.5	17.8	17.2	0.9	0	0	0	0
U13	Unknown		NSW	Metropolitan	21	20.5	20.8	0.4	0	0	0	0
W1	White box	Eucalyptus albens	NSW	Northern Tablelands	13.2	11.1	12.2	1.5	0	0	0	0
W2	Wandoo	Eucalyptus wandoo	WA	Lower West	18.6	18.8	18.7	0.1	0	0	0	0
W3	White gum (wandoo)	Eucalyptus wandoo	WA	Central West	17.3	18.7	18	1	0	0	0	0
W4	Wildflower		TAS	West and South Coast and Highlands	10	9.6	9.8	0.3	0	0	0	0
W5	Wildflower		TAS	West and South Coast and Highlands	11.3	11.8	11.6	0.4	10.8	11	10.9	0.1
W6	Wildflower		TAS	West and South Coast and Highlands	15.4	16.7	16.1	0.9	15.3	16.4	15.9	0.8
W7	Winter wildflower		WA	Lower West	0	0	0	0	0	0	0	0
W8	Spring wildflower		WA	Lower West	0	0	0	0	0	0	0	0
W9	Wandoo	Eucalyptus wandoo	WA	Lower West	0	0	0	0	0	0	0	0
W10	Wildflower		WA	Central West	0	0	0	0	0	0	0	0
W11	Whitegum (wandoo)	Eucalyptus wandoo	WA	Unknown	0	0	0	0	0	0	0	0
W12	Wildflower		TAS	Northwest Coast and King Island	0	0	0	0	0	0	0	0
W13	Wildflower		TAS	West and South Coast and Highlands	12.2	11.1	11.7	0.8	11.8	11.1	11.5	0.5
W14	Wandoo	Eucalyptus wandoo	WA	Lower West	0	0	0	0	0	0	0	0
W15	Wandoo	Eucalyptus wandoo	WA	Central West	0	0	0	0	0	0	0	0
WG1	Western gum	Eucalyptus sp.	NSW	Central West Slopes and Plains	0	0	0	0	0	0	0	0
Y1	Yellow box/ Blakely's redgum	Eucalyptus melliodora/ Eucalyptus blakelyi	NSW	South West Slopes	18.2	17.8	18	0.3	0	0	0	0
Y2	Yellow box	Eucalyptus melliodora	NSW	Central Tablelands	0	0	0	0	0	0	0	0
Y3	Yellow box	Eucalyptus melliodora	NSW	Southern Tablelands	13.6	11.7	12.7	1.3	0	0	0	0
Y4	Yellow box	Eucalyptus melliodora	NSW	Central West Slopes and Plains	0	0	0	0	0	0	0	0
Y5	Yate	Eucalyptus occidentalis	WA	South Coastal	16.8	16.7	16.8	0.1	0	0	0	0
Y6	Yate	Eucalyptus occidentalis	WA	South Coastal	0	0	0	0	0	0	0	0
Y7	Yellow box	Eucalyptus melliodora	NSW	South West Slopes	0	0	0	0	0	0	0	0
Y8	Yellow box, flatweed	Eucalyptus melliodora, Hypochoeris radicata	NSW	Northern Tablelands	0	0	0	0	0	0	0	0
YG1	York gum	Eucalyptus loxophleba	WA	Lower West	0	0	0	0	0	0	0	0
YM1	Yellow box, mistletoe	Eucalyptus melliodora, Amyema/Lysiana sp.	NSW	Central Tablelands	0	0	0	0	0	0	0	0
1. Values of zero correspond to undetectable antibacterial activity (<5% phenol equivalent)
